# Supplementary material for: eCPR bei prähospitalem therapierefraktärem Herz-Kreislauf-Stillstand
Source: Springer Nature journal article supplement (doi:10.1007/s10049-019-0568-2), 2019-02-13
Supplement: MOESM1 [file 16471288]

ESM-Tabelle: Beispiele für antizipierbare Prozessprobleme, Lösungsansätze und Verantwortlichkeiten bei der Planung, Implementierung und Umsetzung eines eCPR-Programms für Patienten mit prähospitalem Herz-Kreislaufstillstand. Zu möglichen Rollen- und Aufgabenverteilungen während des Einsatzes selbst, siehe auch Beispiele zu Role-Cards

| **Nr.** | **Problem** | **Lösungsansatz** | **Verantwortliches Team-Mitglied/ Anmerkungen** |
| --- | --- | --- | --- |
| **1** | Aufbau, Funktion und Ablauf von eCPR Teilen sind des Fachpersonals unbekannt-> Unsicherheit und Ablehnung | Aufklärung, Information und Training aller beteiligten Personengruppen im Vorfeld  Zum Beispiel:  Literatur; Medien (Videos!), Kontaktmöglichkeit zu Experten, Schreiben über Verteiler/ Aushänge im Dienstbereich, Vorträge/ Informationsveranstaltungen, gemeinsame Simulationstrainings | eCPR-Zentrum/ Anbieter  Rettungsdienst, Notarztdienst |
| **2** | Unsicherheit und Uneinheitlichkeit bei der Identifikation geeigneter Patienten | Klare Charakterisierung der Subgruppe geeigneter Patienten  Katalog mit Pro- und Kontrakriterien; Dissemination wie unter 1;  Fallbeispiele zur Verdeutlichung  SOP/ Standard zur Vereinheitlichung | eCPR-Zentrum/ Anbieter,  Rettungsdienst, Notarztdienst, Leitstelle |
| **3** | Unsicherheit bezüglich eines geeigneten Zeitpunkts und Modus zur *Veranlassung* von eCPR/ Alarmierung des eCPR-Teams | Vereinbarung und klare Darstellung eines geeigneten Zeitpunkts und Modus der Alarmierung  unter Berücksichtigung von Literatur zum natürlichen Verlauf bei therapierefraktärem OHCA sowie lokaler Gegebenheiten  Definition der Leitstellenkommunikation und –disposition/ Einsatzstichworte/ Modifikation der Alarm- und Ausrückeordnung | eCPR-Zentrum/ Anbieter,  Rettungsdienst, Notarztdienst, Leitstelle  Siehe auch Konsensuspapier Dt. Fachgesellschaften (Michels et. al. 2018) |
| **4** | Ungenügende Erfassung entscheidungsrelevanter Informationen | Aufklärung aller Beteiligten über die entscheidungsrelevanten Informationen; Betonung besonders „fragiler“ Angaben (zum Beispiel: War der Kollaps wirklich beobachtet?; Qualität der Laien-CPR?, tatsächliche Liegedauer?; Lebenszeichen unter CPR?), die retrospektiv nur schwer erfasst werden können | eCPR-Zentrum, Rettungsdienst, Notarztdienst, Leitstelle |
| **5** | Unsicherheit bezüglich eines geeigneten Zeitpunkts und Modus zum tatsächlichen Wechsel *zur Durchführung* von eCPR | Siehe Punkt 3; klare Darstellung eines geeigneten Zeitpunkts und Modus der Alarmierung  unter Berücksichtigung von Literatur zum natürlichen Verlauf bei therapierefraktärem außerklinischem Herz-Kreislaufstillstand sowie lokaler Gegebenheiten | Leitungsebenen eCPR-Zentrum, Rettungsdienst, Notarztdienst |
| **6** | Unklarheit bezüglich Modifikation des Advanced Life Support, ALS-Algorithmus bei Entscheidung zur eCPR bis zum Anlaufen der eCPR | Erarbeitung, Vereinbarung und klare Darstellung notwendiger bzw. gewünschter Abweichungen vom üblichen ALS-konformen Vorgehen bei Reanimation  Unterstützung durch Checkliste | eCPR-Zentrum, Rettungsdienst, Notarztdienst  während des Einsatzes: ALS-Leader-eCPR-Leader |
| **7** | Gefahr ungeordneter Kommunikation mit zunehmender Personenzahl zwischen ALS- und eCPR-Team während des Einsatzes | Erarbeitung, Vereinbarung und klare Darstellung der vorgesehenen Kommunikationsstruktur während des Einsatzes,  z. B. Teamleader ALS-Teamleader eCPR  Lernziel im Simulationstraining  während des Einsatzes: klare Rollenzuweisung innerhalb ALS- und eCPR-Team. | eCPR-Zentrum, Rettungsdienst, Notarztdienst  während des Einsatzes:  Teamleader ALS und Teamleader eCPR |
| **8** | Unsicherheit bei Rollenzuteilung und Verantwortlichkeiten | Erarbeitung, Vereinbarung und klare Darstellung der vorgesehenen Rollenzuteilung und Verantwortlichkeiten im Vorfeld  **Gesamteinsatzleitung bleibt bei Teamleader ALS**  Lernziel im Simulationstraining  Unterstützung durch Role Cards | eCPR-Zentrum, Rettungsdienst, Notarztdienst  **während des Einsatzes:**  **Teamleader ALS** |
| **9** | Ungewohnte Anforderungen an die Raumaufteilung, Gefahr der Behinderung der Teams durch beengte Raumverhältnisse bis hin zur Unmöglichkeit der Kanülierung vor Ort | Darstellung von Beispielen im Vorfeld  Lernziel im Simulationstraining  Unterstützung durch Checkliste, Timeout  während des Einsatzes:  frühzeitig für ausreichend Raum sorgen.  Frühzeitig gemeinsame Entscheidung, ob Kanülierung vor Ort erfolgen kann  ggf. Verbringen in RTW unter Reanimation | eCPR-Zentrum, Rettungsdienst, Notarztdienst  während des Einsatzes:  ALS-Team  Gemeinsame Absprache  Teamleader ALS und Teamleader eCPR |
| **10** | Gefahr von Spontanbewegungen unter effektiver CPR | Frühzeitige und großzügige Indikationsstellung Narkose, erwäge Relaxierung | Teamleader ALS: Entscheidung und Ansage  ALS-Team: Umsetzung |
| **11** | Gefahr insuffizienter Oxygenierung und Ventilation, insbesondere unter prolongierter mechanischer CPR, Verschlechterung des Ausgangszustands des Patienten vor geplanter eCPR | Frühzeitige und großzügige Indikationsstellung zur endotrachealen Intubation | Teamleader ALS: Entscheidung und Ansage  ALS-Team: Umsetzung |
| **12** | Gefahr für Personal und gleichzeitig Gefahr der Störung des Punktionsvorgangs durch Defibrillation  Später Dislokationsgefahr der Kanülen | Lernziel im Simulationstraining  Unterstützung durch Checkliste, Timeout  während des Einsatzes ab Beginn der Kanülierung Defibrillation nur nach Absprache | Gemeinsame Absprache  Teamleader ALS und Teamleader eCPR  Ansage an Teams laut und deutlich |
| **13** | Fortführung manuelle/ mechanische CPR trotz laufender eCPR | Lernziel im Simulationstraining  Unterstützung durch Checkliste, Timeout  Während des Einsatzes selbst ABCDE-Ansatz und klare Ansage: STOP manuelle/ mechanische CPR | Gemeinsame Absprache  Teamleader ALS und Teamleader eCPR  Ansage an Teams laut und deutlich |
| **14** | Fehlende Vorkenntnisse des Personals über den Gesamtablauf während des Einsatzes selbst | Checkliste/ Manual auf Rettungsmitteln  Strukturierte Timeouts  Klare Kommunikation | Gemeinsame Absprache  Teamleader ALS und Teamleader eCPR  Ansage an Teams laut und deutlich |
| **15** | Gefährdung der Sterilität | Lernziel im Simulationstraining  Unterstützung durch Checkliste, Timeout  Hinweis auf sterilen Bereich, sterile Abdeckung  Sterile Zuarbeit/ Anreichen nur durch geübtes Personal oder mit klaren Ansagen | Gemeinsame Absprache  Teamleader ALS und Teamleader eCPR  Ansage an Teams laut und deutlich |
| **16** | Sicherheitsbedenken bezüglich Transport mit laufender eCPR, Gerätefixierung, Sicherheit des Personals | Klare Absprachen und Planungen im Vorfeld, verbindliche Vereinbarung auf Leitungsebene  Enge Einbeziehung der Expertise der Kardiotechnik und der Erfahrung aus Sekundärtransporten mit ECMO  Klare und nachvollziehbare Kommunikation der Vereinbarungen und des Vorgehens  Rollenaufteilung im Einsatz selbst, Einsatzleitung, Transportverantwortlichkeit des Fahrzeugführers bleiben erhalten | eCPR-Zentrum, Rettungsdienst, Notarztdienst  Gemeinsame Absprache  Teamleader ALS und Teamleader eCPR  Ansage an Teams laut und deutlich  Merke: Zugelassene Transportfixierungen für die eCPR-Konsolen sind erhältlich |
| **17** | Gefahr von Frustration bei problematischen/ misslingenden Einsätzen, ungünstiges Outcome des Patienten trotz maximaler Bemühungen, Invasivität | Intensive Aufklärungstätigkeit zu Funktion, Rolle, Chancen, Risiken und Grenzen der Methode im Vorfeld  breite Einbeziehung der beteiligten Berufsgruppen  Klärung der Erwartungshaltungen an das Programm  gemeinsame (auch In-situ-) Simulationen  Einbeziehung psychologischer und ethischer Beratung im Vorfeld  Sicherstellung einer leistungsfähigen Betreuungs- und Unterstützungsstruktur für die Teams im Bedarfsfall  Kurze Nachbesprechungen ad hoc  Anonyme Feedback-Möglichkeiten  Benennung von Ansprechpartnern  Regelmäßige Zwischenauswertungen durch die Arbeitsgemeinschaften | Leitungsebenen und Arbeitsgemeinschaften in  eCPR-Zentrum, Rettungsdienst, Notarztdienst |
| **18** | Unsicherheit im Umgang mit Angehörigen und der Außenkommunikation | Planung der Außenkommunikation im Vorfeld  Psychologische Beratung der Planungsgremien  Klare Regelungen zur Außenkommunikation  Während des Einsatzes selbst klare Rollenzuweisung für die Kommunikation mit Angehörigen, z.B. 2. eCPR-Teammitglied | Leitungsebenen und Arbeitsgemeinschaften in  eCPR-Zentrum, Rettungsdienst, Notarztdienst  Teamleader ALS und Teamleader eCPR |
| **19** | Unsicherheit über Sinnhaftigkeit des Programms, Grundsatzfragen im weiteren Verlauf | Regelmäßige Zwischenauswertungen durch die Arbeitsgemeinschaften  Re-Evaluation anhand lokaler Epidemiologie  Transparente Darstellung der Auswertungen für die beteiligten Berufsgruppen;  Einbeziehung Überlebender, Angehöriger im freiwilligen Rahmen und unter Wahrung von Persönlichkeits- und Datenschutzrechten bei der Evaluation des Programms und bei weiteren Schulungsmaßnahmen | Leitungsebenen und Arbeitsgemeinschaften in  eCPR-Zentrum, Rettungsdienst, Notarztdienst  Einbeziehung der Unternehmenskommuni-kation nach Bedarf |
